# Supplementary material for: Through thick and thin: a microfluidic approach for continuous measurements of biofilm viscosity and the effect of ionic strength
Source: Royal Society of Chemistry journal article supplement (doi:10.1039/c6lc01101b), 2016-01-01
Supplement: c6lc01101b2.xlsx [file c6lc01101b2.xlsx]

## Sheet: Sheet1
Instructions:	Input the microchannel dimensions & other data					User to add data here				These cells are calculated for you
	channel height (um)	Channel width (um)	Viscosity of the solution (mPa.s)	Flowrate (ml/hour)		Time (hour)	Measured biofilm velocity (um/h)	Measured biofilm height (um)		Unitless speed	Unitless height	Unitles viscosity ratio	Viscosity (mPa.s)
	400	2000	1	0.2		14	0.37	7.90594		1.48e-06	0.0197649	42816.7	42816.7
						66	4.74667	269.308		1.89867e-05	0.673271	3.73448e+06	3.73448e+06
